# Supplementary material for: The Intellectual Profile of Adults with Specific Learning Disabilities
Source: MDPI journal article supplement (doi:10.3390/jintelligence11120223), 2023-12-09
Supplement: s1 [file s1]

## **Supplementary Materials**

### **The Intellectual Profile of Adults With Specific Learning Disabilities**

**Table S1.** Developmental sample: number of cases with available data, standardized mean scores (and SDs), medians, and scores range in the WAIS-IV main and supplementary subtests and Indexes obtained by children with SLD.

| Measure                                      | N    | M (SD)         | Median | Range (min – max) |
|----------------------------------------------|------|----------------|--------|-------------------|
| <b>Core Subtests</b>                         |      |                |        |                   |
| Similarities                                 | 1610 | 10.26 (2.90)   | 10     | 1 – 19            |
| Vocabulary                                   | 1610 | 10.38 (2.81)   | 10     | 1 – 19            |
| Comprehension                                | 1610 | 10.92 (3.20)   | 11     | 1 – 19            |
| Block Design                                 | 1610 | 10.34 (2.83)   | 10     | 1 – 19            |
| Picture Concepts                             | 1610 | 11.02 (2.92)   | 11     | 1 – 19            |
| Matrix Reasoning                             | 1610 | 10.69 (3.04)   | 11     | 1 – 18            |
| Digit Span                                   | 1610 | 8.17 (2.54)    | 8      | 1 – 18            |
| Letter-Number seq.                           | 1609 | 8.56 (2.55)    | 9      | 1 – 19            |
| Coding                                       | 1610 | 8.36 (2.86)    | 8      | 1 – 19            |
| Symbol Search                                | 1610 | 9.31 (2.75)    | 9      | 1 – 19            |
| <b>Supplementary Subtests (as available)</b> |      |                |        |                   |
| Information                                  | 495  | 9.41 (3.14)    | 9      | 1 – 19            |
| Arithmetic Reasoning                         | 590  | 8.46 (3.10)    | 9      | 1 – 17            |
| Cancellation                                 | 236  | 9.15 (3.19)    | 9      | 1 – 18            |
| <b>Indexes</b>                               |      |                |        |                   |
| VCI                                          | 1609 | 103.12 (14.80) | 102    | 56 – 148          |
| PRI                                          | 1609 | 104.27 (14.28) | 104    | 56 – 143          |
| WMI                                          | 1609 | 90.23 (12.99)  | 88     | 41 – 139          |
| PSI                                          | 1609 | 93.10 (14.08)  | 91     | 47 – 144          |
| FSIQ                                         | 1608 | 98.29 (12.43)  | 98     | 70 – 144          |

*Note.* WAIS-IV Indexes: VCI = Verbal Comprehension Index; PRI = Perceptual Reasoning Index; WMI = Working Memory Index; PSI = Processing Speed Index; FSIQ = Full-Scale IQ.

**Figure S1.** Results of the Confirmatory Factor Analysis (standardized loadings and 95% CIs) for adults with SLD (black parameters in bold) and the population without SLD (gray parameters) based on a Four-Factor Structure, with “Arithmetic reasoning” and “Information” removed from the model.

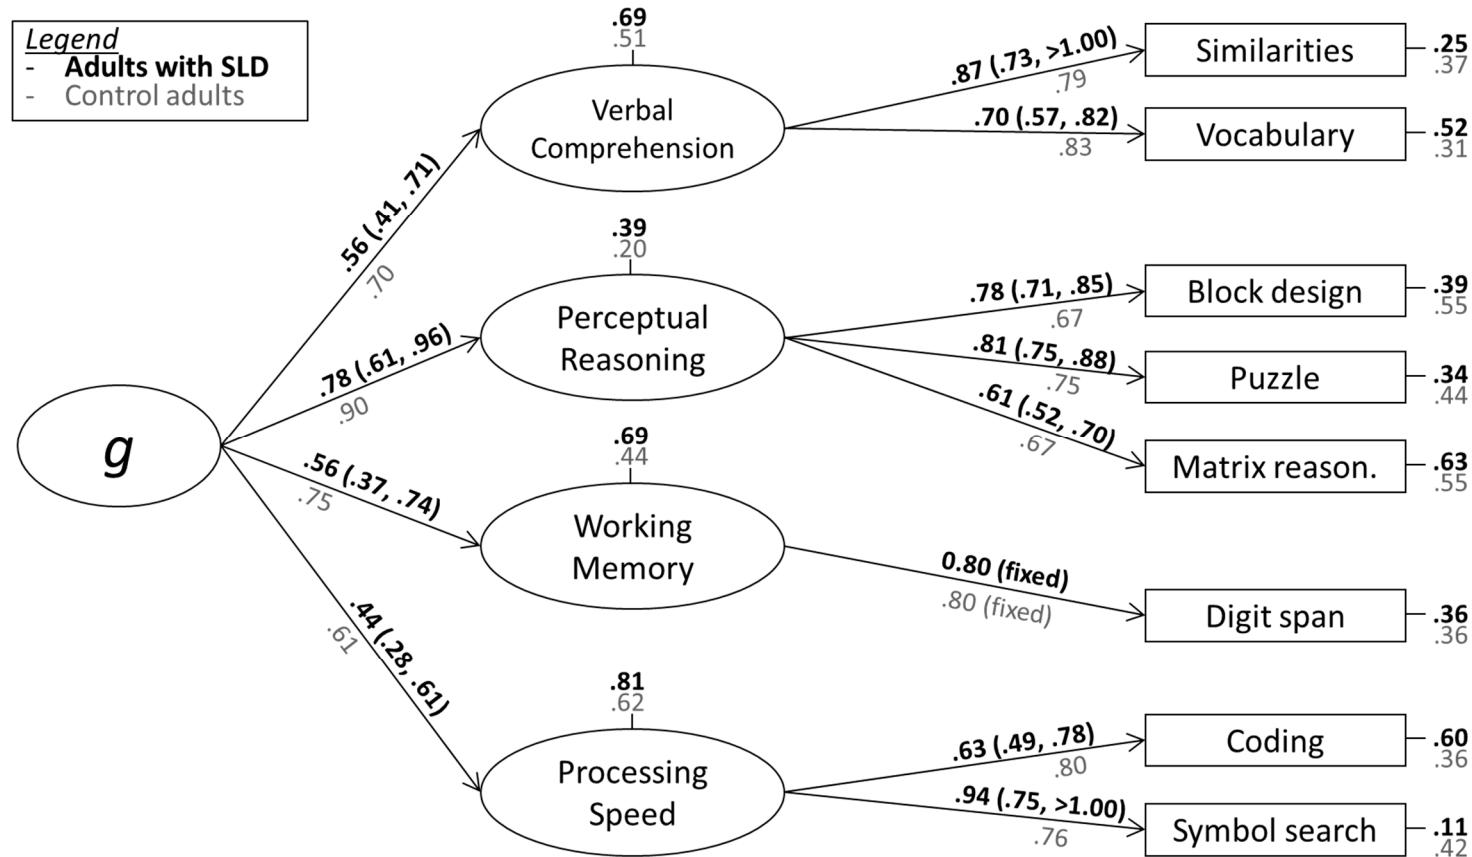

Standardized fit indices for the model on adults with SLD:  $\chi^2(17) = 59.14$ ,  $p < 0.001$ , RMSEA = 0.09, SRMR = 0.05, CFI = 0.94, NNFI = 0.90.

Modification indices suggest that model could be improved with: loading of WM factor on Matrix Reasoning; direct loading of g factor on Matrix Reasoning; correlated residuals between Block Design and Puzzle (first three options).

**Figure S2.** Results of the Confirmatory Factor Analysis (standardized loadings and 95% CIs) for adults with SLD (black parameters in bold) and the population without SLD (gray parameters) based on a Five-Factor Structure, with “Arithmetic reasoning” and “Information” removed from the model.

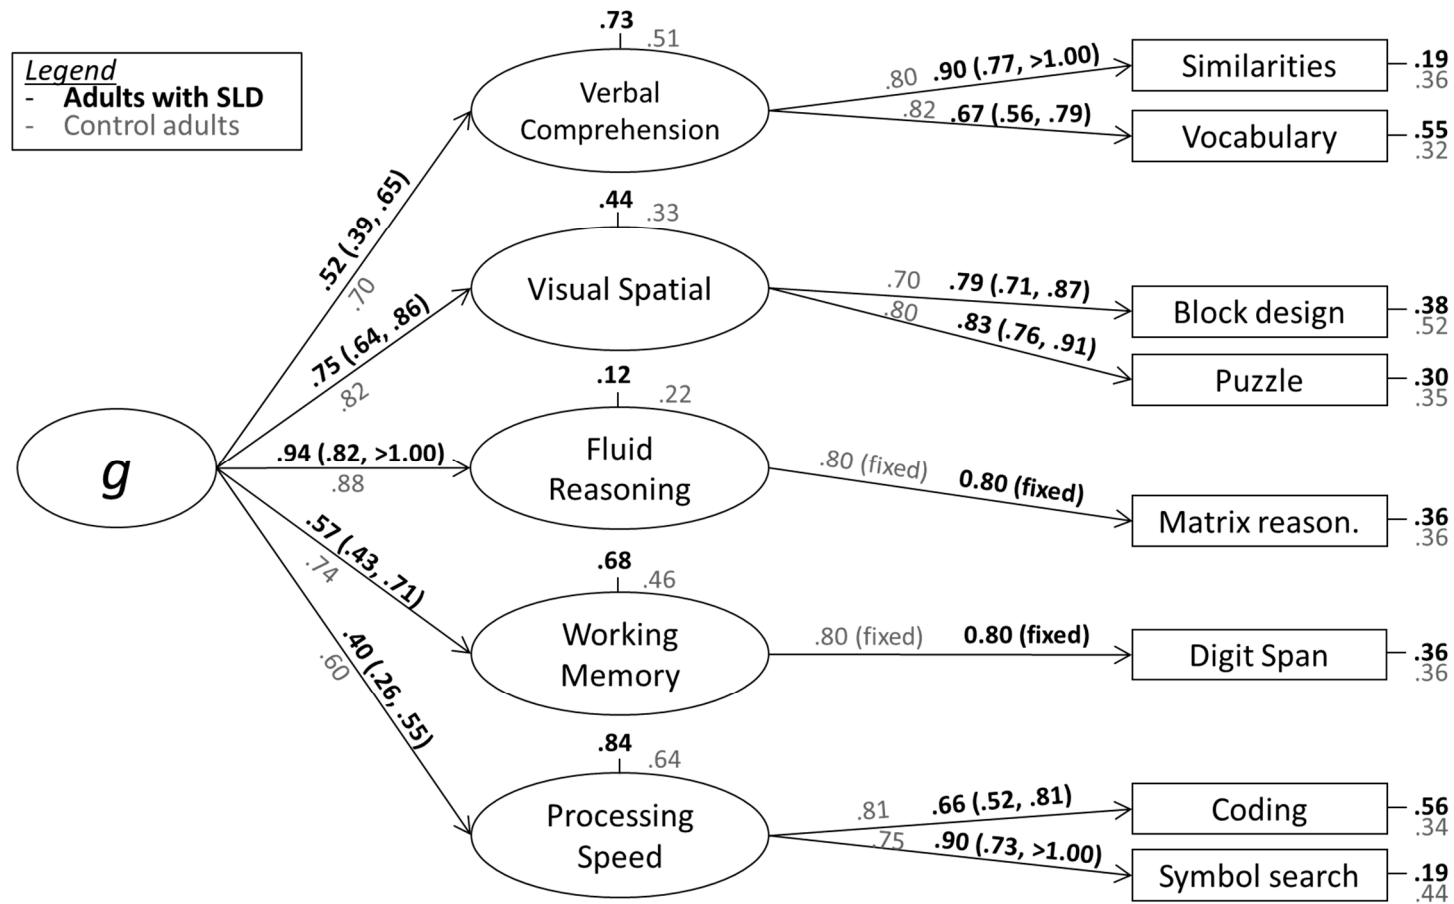

Standardized fit indices for the model on adults with SLD:  $\chi^2(17) = 40.33$ ,  $p = 0.001$ , RMSEA = 0.07, SRMR = 0.04, CFI = 0.97, NNFI = 0.94
